# Supplementary material
Source: MDPI journal article supplement (https://www.mdpi.com/2073-4395/13/5/1210)
Supplement: s1 [file s1]

**Table S1. Primers used in the study.**

| <b>Primers</b> | <b>Sequence shown in 5'→3' orientation</b> | <b>Description</b>                               |
|----------------|--------------------------------------------|--------------------------------------------------|
| Actin-F        | GAGGGACCGCTCTCGTCGT                        | qRT-PCR primers for Actin (GenBank: Foxq13729)   |
| Actin-R        | GGAGATCCAGACTGCCGCTCAG                     |                                                  |
| FUB1-F         | ACTTCGCCTCGTCATCTC                         | qRT-PCR primers for FUB1 (GenBank: FFUJ_02105)   |
| FUB1-R         | GAACCCAGCATCAAACCTTAT                      |                                                  |
| FUB4-F         | CACCCTTGCTCATCACAG                         | qRT-PCR primers for FUB4 (GenBank: FFUJ_02108)   |
| FUB4-R         | CGTAAAAATATCCTTCCGAATAATC                  |                                                  |
| FUB10-F        | CCTCCTCAGCACCTCCAA                         | qRT-PCR primers of FUB10 (GenBank: J7337_003438) |
| FUB10-R        | ACTCCCGAATAACCCCAA                         |                                                  |
| VelA-F         | CTACTAAGGAGGAAAGGGACT                      | qRT-PCR primers for VelA (GenBank: FN548142)     |
| VelA-R         | CTACTAAGGAGGAAAGGGACT                      |                                                  |
| velB-F         | CAGTGCGATTGAGGACAT                         | qRT-PCR primers for velB (GenBank: FTJAE_9136)   |
| velB-R         | CAGTGCGATTGAGGACAT                         |                                                  |
| LaeA-F         | TGCGCGTGCAATTGTGTAAAA                      | qRT-PCR primers for LaeA (GenBank: FVEG_00539)   |
| LaeA-R         | CCACCACAGAAGACGACGAA                       |                                                  |
| Actin-F        | TGGTCGGAATGGGACAGAAG                       | qRT-PCR primers for Actin (GenBank: BT013524)    |
| Actin-R        | CTCAGTCAGGAGAACAGGGT                       |                                                  |
| PR1-F          | GGATCGGACAACGTCCTTAC                       | qRT-PCR primers for PR1 (GenBank: Y08804)        |
| PR1-R          | GCAACATCAAAAGGGAAATAAT                     |                                                  |
| NPR1-F         | GGGAAAGATAGCAGCACG                         | qRT-PCR primers for NPR1 (GenBank: 543939)       |
| NPR1-R         | GTCCACACAAACACACACATC                      |                                                  |
| PR2-F          | AAGTATATAGCTGTTGGTAATGAA                   | qRT-PCR primers for PR2                          |

|       |                       |                                                      |
|-------|-----------------------|------------------------------------------------------|
| PR2-R | ATTCTCATCAAACATGGCGAA | (GenBank:<br>NM001247229)                            |
| PR5-F | GCAACAACGTGCCATACACC  | qRT-PCR primers for PR5<br>(GenBank:<br>NM001247422) |
| PR5-R | AGACTCCACCACAATCACC   |                                                      |

---
